# Supplementary material for: Visible-light excited luminescent trigonal prismatic metallocages from a template-directed assembly
Source: Royal Society of Chemistry journal article supplement (doi:10.1039/d1qi00409c), 2021-01-01
Supplement: d1qi00409c1.pdf [file d1qi00409c1.pdf]

## *Electronic Supplementary Information (ESI)*

### **Visible-light Excited Luminescent Trigonal Prismatic Metallocages from Template-directed Assembly**

Jian-Ping Xu,<sup>†a</sup> Wen Zou,<sup>†a</sup> Shun-Ze Zhan,<sup>\*ab</sup> Ji Zheng,<sup>b</sup> Kun Wu,<sup>b</sup> Guo-Hui Zhang,<sup>a</sup>  
Jing-Hong Li,<sup>a</sup> Mian Li,<sup>a</sup> Guo-Hong Ning,<sup>b</sup> and Dan Li<sup>\*b</sup>

<sup>a</sup> Department of Chemistry and Key Laboratory for Preparation and Application of Ordered Structural Materials of Guangdong Province, Shantou University, Shantou 515063, P. R. China  
\*Email: [szzhan@stu.edu.cn](mailto:szzhan@stu.edu.cn)

<sup>b</sup> College of Chemistry and Materials Science, and Guangdong Provincial Key Laboratory of Functional Supramolecular Coordination Materials and Applications, Jinan University, Guangzhou 510632, P. R. China \*Email: [danli@jnu.edu.cn](mailto:danli@jnu.edu.cn)

<sup>†</sup> J.-P. Xu and W. Zou contributed equally to this work.

#### **Content**

|                                                                                                             |    |
|-------------------------------------------------------------------------------------------------------------|----|
| Section 1: Experimental Section .....                                                                       | 2  |
| 1.1 Materials and Physical Measurements .....                                                               | 2  |
| 1.2 Synthesis .....                                                                                         | 3  |
| 1.2.1 Synthesis of ligand <i>HL</i> .....                                                                   | 3  |
| 1.2.2 Synthesis of the complexes.....                                                                       | 3  |
| Section 2: Crystal Data .....                                                                               | 6  |
| 2.1 Crystal Structure Determination .....                                                                   | 6  |
| 2.2 Crystal Data .....                                                                                      | 7  |
| Section 3: Additional Structural Description .....                                                          | 13 |
| 3.1 <sup>1</sup> H NMR and PXRD.....                                                                        | 13 |
| 3.2 Structural Description .....                                                                            | 15 |
| 3.3 Thermogravimetric analysis.....                                                                         | 17 |
| Section 4: Spectra Properties .....                                                                         | 18 |
| 4.1 UV-Vis absorption spectra.....                                                                          | 18 |
| 4.2 photoluminescence spectra .....                                                                         | 19 |
| Section 5: Computational Details .....                                                                      | 26 |
| 5.1 EDA calculation.....                                                                                    | 26 |
| 5.2 Density Functional Theory (DFT) and Time-Dependent Density Functional Theory (TDDFT) Calculations ..... | 27 |
| Section 6: Reference .....                                                                                  | 37 |

## Section 1: Experimental Section

### 1.1 Materials and Physical Measurements

Commercially available chemicals were purchased and used without further purification. Infrared spectrum (IR) was obtained in KBr disk on a Nicolet Avatar 360 FTIR spectrometer in the range of 4000–400  $\text{cm}^{-1}$ ; abbreviations used for the IR bands are: w = weak, m = medium, s = strong, vs = very strong. Elemental analysis (EA) of C, H, N, S was performed with an Elementar Vario EL III CHNS analyzer.  $^1\text{H}$ -NMR spectroscopy was performed on a Bruker DPX 400 spectrometer using tetramethylsilane (TMS) as internal standard. All  $\delta$  values are given in ppm. Thermogravimetric analysis (TGA) was performed on a TA Instruments Q50 Thermogravimetric Analyzer under a nitrogen flow of 40  $\text{mL}\cdot\text{min}^{-1}$  at a heating rate of 10  $^{\circ}\text{C}\cdot\text{min}^{-1}$ . Powder X-ray diffraction (PXRD) experiment was performed on a MiniFlex 600 X-ray diffractometer of Rigaku Corporation.

The solid-state UV-Vis absorption spectra were recorded on a Lambda950 UV/Vis/NIR spectrophotometer of Perkin Elmer. Steady-state photoluminescence spectra and lifetime were measured with an Edinburgh FLS920 single photon counting spectrometer equipped with a continuous Xe900 xenon lamp, a  $\mu\text{F900}$   $\mu\text{s}$  flash lamp, a red-sensitive Peltier-cooled Hamamatsu R928P photomultiplier tube (PMT), and a closed-cycle cryostat using liquid helium as cooling medium (Advanced Research Systems). The corrections of excitation and emission for the detector response were performed ranging from 200 to 900 nm. The data were analyzed by iterative convolution of the luminescence decay profile with the instrument response function using the software package provided by Edinburgh Instruments. In all cases, the crystalline sample was selected under a microscope with 40-time amplification. The phase purity of the sample is assured by elemental analysis and PXRD measurement.

## 1.2 Synthesis

### 1.2.1 Synthesis of ligand *HL*

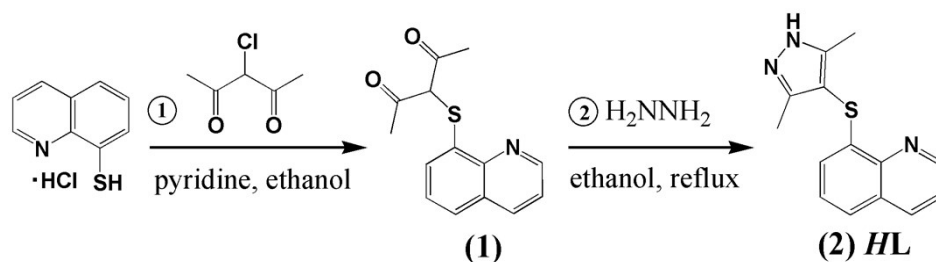

**Scheme S1** Synthesis procedure of the ligand *HL*.

The ligand 4-(quinoline-8-thio)-3,5-dimethyl-1H-pyrazole (*HL*) was synthesized according to the literature with modifications (**Scheme S1**).<sup>S1</sup>

A mixture of quinoline-8-thiol hydrochloride 0.9884 g (5.0 mmol), 3-chloropentane-2,4-dione 0.6725 g (5.0 mmol), pyridine (2.0 mL) in ethanol (40.0 mL) was stirred at room temperature for 24 h. After cooled to room temperature, the solution was evaporated under reduced pressure to give a white intermediate (1). The intermediate (0.821 g, 4.0 mmol) was then dissolved in ethanol (25 mL), and excess hydrazine hydrate (80%, 0.5 mL, 12.5 mmol) was added with stirring. The mixture was refluxed for 10 h and then cooled. The resulted solution was evaporated under reduced pressure to give faint yellow solid. The solid was recrystallized in ethanol to give faint yellow crystal as *HL* (2). Yield 60%. IR (KBr pellet, cm<sup>-1</sup>): 3180(s), 3089(s), 2922(s), 2871(s), 1595(s), 1563(m), 1477(m), 1432(s), 1314(w), 1151(w), 1086(w), 1002(m), 846(w), 793(s), 751(m), 680(w), 579(w). <sup>1</sup>H NMR (400 MHz, CD<sub>2</sub>Cl<sub>2</sub>, Fig. S1) δ 8.98 (dd, *J* = 4.2, 1.7 Hz, 1H), 8.22 (dd, *J* = 8.3, 1.7 Hz, 1H), 7.61 (d, *J* = 8.1 Hz, 1H), 7.52 (dd, *J* = 8.3, 4.2 Hz, 1H), 7.37 (t, *J* = 7.8 Hz, 1H), 6.85 (m, 1H), 2.33(s, 6H).

### 1.2.2 Synthesis of the complexes

#### (I) One-pot synthesis

A mixture of *HL* (6.40 mg, 0.025 mmol), CuI (9.5 mg, 0.05 mmol) or CuBr (7.20 mg, 0.05 mmol), benzene (**B**, 1.0 mL)/toluene (**MB**, 1.0 mL) in 1.0 mL ethanol or 1,3,5-triphenylbenzene (**TPB**, 5.0 mg, 0.016 mmol) in 2.0 mL ethanol, NH<sub>3</sub>·H<sub>2</sub>O (25%, 50 μL) was sealed into a Pyrex tube with 8 mm diameter. Then the tube was heated at 140 °C in a programmable oven for 72 h and cooled to room temperature at the rate of -5

°C/h. Orange column crystals of **B@I**, **MB@I**, **TPB@I**, **B@Br**, **MB@Br** or **TPB@Br** were obtained with yield no more than 15% (based on *HL*).

## (II) Step-by-step synthesis

A mixture of *HL* (5.10 mg, 0.02 mmol), CuBr (2.87 mg, 0.02 mmol), DMF (1.0 mL), H<sub>2</sub>O (1.0 mL), NH<sub>3</sub>·H<sub>2</sub>O (25%, 50 μL) was sealed into a Pyrex tube with 8 mm diameter. Then the tube was heated at 140 °C in a programmable oven for 72 h and cooled to room temperature at the rate of -5 °C/h. Colorless column crystals of complex Cu<sub>3</sub>L<sub>3</sub> were obtained in 57% yield (based on *HL*).

A mixture of Cu<sub>3</sub>L<sub>3</sub> (7.6 mg, 0.008 mmol), CuI (9.50 mg, 0.05 mmol) or CuBr (7.20 mg, 0.05 mmol), benzene (**B**, 1.0 mL)/toluene (**MB**, 1.0 mL) in 1.0 mL ethanol or 1,3,5-triphenylbenzene (**TPB**, 5.0 mg, 0.016 mmol) in 2.0 mL ethanol, was sealed into a Pyrex tube with 8 mm diameter. Then the tube was heated at 140 °C in a programmable oven for 72 h and cooled to room temperature at the rate of -5 °C/h. Orange column crystals were obtained with yield 35~45% (based on Cu<sub>3</sub>L<sub>3</sub>).

Results:

Cu<sub>3</sub>L<sub>3</sub>: Anal. Calcd for C<sub>42</sub>H<sub>36</sub>Cu<sub>3</sub>N<sub>9</sub>S<sub>3</sub>: C, 52.91; H, 3.78; N, 13.22; S, 10.09; Found: (%): C, 53.04; H, 3.70; N, 13.12; S, 10.01. IR (KBr pellet, cm<sup>-1</sup>): 3055(m), 2913(m), 1577(s), 1491(vs), 1454(m), 1417(s), 1354(s), 1302(m), 1142(m), 1064(m), 979(m), 819(m), 784(s), 682(w), 654(m), 631(w), 538(m).

**B@I**: Anal. Calcd for C<sub>102</sub>H<sub>90</sub>Cu<sub>12</sub>I<sub>6</sub>N<sub>18</sub>S<sub>6</sub>: C, 37.30; H, 2.76; N, 7.68; S, 5.86; Found: (%): C, 37.18; H, 2.55; N, 7.75; S, 5.94. IR (KBr pellet, cm<sup>-1</sup>): 3022(w), 2955(w), 2912(m), 1580(s), 1492(vs), 1455(m), 1420(s), 1376(s), 1303(m), 1146(m), 1067(m), 1032(m), 985(s), 823(vs), 783(vs), 762(s), 687(vs), 633(w), 535(m).

**B@Br**: Anal. Calcd for C<sub>102</sub>H<sub>90</sub>Br<sub>6</sub>Cu<sub>12</sub>N<sub>18</sub>S<sub>6</sub>: C, 40.81; H, 3.02; N, 8.40; S, 6.41; Found: (%): C, 40.90; H, 3.10; N, 8.52; S, 6.30. IR (KBr pellet, cm<sup>-1</sup>): 3021(w), 2955(w), 2913(m), 1577(s), 1491(vs), 1454(m), 1420(s), 1377(s), 1302(m), 1147(m), 1068(m), 1035(m), 980(s), 822(vs), 781(vs), 760(s), 689(vs), 631(w), 534(m).

**MB@I**: Anal. Calcd for C<sub>105</sub>H<sub>96</sub>I<sub>6</sub>Cu<sub>12</sub>N<sub>18</sub>S<sub>6</sub>: C, 37.91; H, 2.91; N, 7.58; S, 5.78; Found: (%): C, 37.99; H, 2.80; N, 7.69; S, 5.65. IR (KBr pellet, cm<sup>-1</sup>): 3041(w), 2956(w), 2912(m), 2847(w), 1589(s), 1492(vs), 1453(m), 1418(s), 1375(s), 1302(m),

1147(m), 1069(m), 1038(m), 983(s), 825(vs), 782(vs), 764(s), 743(s), 694(m), 633(w), 536(m).

**MB@Br:** Anal. Calcd for  $C_{105}H_{96}Br_6Cu_{12}N_{18}S_6$ : C, 41.42; H, 3.18; N, 8.28; S, 6.32; Found: (%): C, 41.31; H, 3.11; N, 8.25; S, 6.39. IR (KBr pellet,  $cm^{-1}$ ): 3042(w), 2956(w), 2912(m), 2850(w), 1589(s), 1493(vs), 1455(m), 1419(s), 1374(s), 1303(m), 1148(m), 1068(m), 1037(m), 983(s), 825(vs), 784(vs), 764(s), 745(s), 688(m), 633(w), 534(m).

**TPB@I:** Anal. Calcd for  $C_{108}H_{90}I_6Cu_{12}N_{18}S_6$ : C, 38.65; H, 2.70; N, 7.51; S, 5.73; Found: (%): C, 38.78; H, 2.61; N, 7.40; S, 5.85. IR (KBr pellet,  $cm^{-1}$ ): 3054(w), 3040(w), 2958(w), 2913(m), 2848(w), 1590(s), 1492(vs), 1453(m), 1417(m), 1375(s), 1355(m), 1304(m), 1148(m), 1089(m), 1033(w), 981(s), 826(vs), 783(vs), 766(s), 698(m), 633(w), 538(m).

**TPB@Br:** Anal. Calcd for  $C_{108}H_{90}Br_6Cu_{12}N_{18}S_6$ : C, 42.19; H, 2.95; N, 8.20; S, 6.26; Found: (%): C, 42.05; H, 2.81; N, 8.32; S, 6.30. IR (KBr pellet,  $cm^{-1}$ ): 3057(w), 3041(w), 2959(w), 2914(m), 2850(w), 1591(s), 1494(vs), 1455(m), 1419(s), 1373(s), 1356(m), 1304(m), 1150(m), 1070(m), 1038(m), 980(s), 828(vs), 784(vs), 765(s), 700(m), 634(w), 536(m).

**Caution!** In the synthesis of these complexes, the volume of solution should not exceed one half of the volume of the Pyrex tube to avoid overloading. Be careful of avoiding potential empyrosis and catching fire when flame-sealing.

## Section 2: Crystal Data

### 2.1 Crystal Structure Determination

Suitable crystals were mounted with glue at the end of a glass fiber. Single crystal data of the **G@X** complexes were collected on a Rigaku OD (Enhance Cu X-ray Source,  $K\alpha$ ,  $\lambda = 1.54178 \text{ \AA}$ ) with CCD Plate (XtaLAB Pro: Kappa single) under a cold nitrogen stream (100 K). Mo X-ray Source ( $K\alpha$ ,  $\lambda = 0.71073 \text{ \AA}$ ) was used for collecting single crystal data of the  $\text{Cu}_3\text{L}_3$  complex. The data was processed using CrysAlisPro 1.171.39.28b (Rigaku Oxford Diffraction, 2015). Multi-scan absorptions were applied. Structure were solved by direct methods and refined on  $F^2$  using full-matrix least-squares using SHELXL<sup>S2</sup> within the OLEX2 suite.<sup>S3</sup>

All non-hydrogen atoms were refined with anisotropic thermal parameters, and all hydrogen atoms were included in calculated positions and refined with isotropic thermal parameters riding on the parent atoms. Structural diagrams were produced by using the OLEX computer program.<sup>S4</sup> Crystal data and structure refinement for these complexes are summarized in Table S1. Selected bond lengths and angles are given in Tables S2-5. CCDC nos. 2048251, 2048259, 2048264, 2048269, 2048272, 2048273, 2060347 contain the supplementary crystallographic data for this paper.

## 2.2 Crystal Data

**Table S1** Summary of crystal and structure refinement data for Cu<sub>3</sub>L<sub>3</sub> and G@X complexes

|                                                                           | Cu <sub>3</sub> L <sub>3</sub>                                                | B@I                                                                                                | MB@I                                                                                               | TPB@I                                                                                              | B@Br                                                                                                | MB@Br                                                                                               | TPB@Br                                                                                              |
|---------------------------------------------------------------------------|-------------------------------------------------------------------------------|----------------------------------------------------------------------------------------------------|----------------------------------------------------------------------------------------------------|----------------------------------------------------------------------------------------------------|-----------------------------------------------------------------------------------------------------|-----------------------------------------------------------------------------------------------------|-----------------------------------------------------------------------------------------------------|
| CCDC No.                                                                  | 2060347                                                                       | 2048259                                                                                            | 2048269                                                                                            | 2048273                                                                                            | 2048251                                                                                             | 2048264                                                                                             | 2048272                                                                                             |
| Empirical formula                                                         | C <sub>42</sub> H <sub>36</sub> Cu <sub>3</sub> N <sub>9</sub> S <sub>3</sub> | C <sub>102</sub> H <sub>90</sub> Cu <sub>12</sub><br>I <sub>6</sub> N <sub>18</sub> S <sub>6</sub> | C <sub>105</sub> H <sub>96</sub> Cu <sub>12</sub><br>I <sub>6</sub> N <sub>18</sub> S <sub>6</sub> | C <sub>108</sub> H <sub>90</sub> Cu <sub>12</sub><br>I <sub>6</sub> N <sub>18</sub> S <sub>6</sub> | C <sub>102</sub> H <sub>90</sub> Cu <sub>12</sub><br>Br <sub>6</sub> N <sub>18</sub> S <sub>6</sub> | C <sub>105</sub> H <sub>96</sub> Cu <sub>12</sub><br>Br <sub>6</sub> N <sub>18</sub> S <sub>6</sub> | C <sub>108</sub> H <sub>90</sub> Cu <sub>12</sub><br>Br <sub>6</sub> N <sub>18</sub> S <sub>6</sub> |
| Formula weight                                                            | 953.60                                                                        | 3284.16                                                                                            | 3326.23                                                                                            | 3356.22                                                                                            | 3002.21                                                                                             | 3044.29                                                                                             | 3074.28                                                                                             |
| Temperature (K)                                                           | 100(2)                                                                        | 100(2)                                                                                             | 100(2)                                                                                             | 100(2)                                                                                             | 100(2)                                                                                              | 100(2)                                                                                              | 100(2)                                                                                              |
| Crystal system                                                            | Triclinic                                                                     | Hexagonal                                                                                          | Hexagonal                                                                                          | Hexagonal                                                                                          | Hexagonal                                                                                           | Hexagonal                                                                                           | Hexagonal                                                                                           |
| Space group                                                               | <i>P</i> -1                                                                   | <i>P</i> 6 <sub>3</sub> / <i>m</i>                                                                  | <i>P</i> 6 <sub>3</sub> / <i>m</i>                                                                  | <i>P</i> 6 <sub>3</sub> / <i>m</i>                                                                  |
| <i>a</i> (Å)                                                              | 7.4405(2)                                                                     | 17.9429(1)                                                                                         | 18.0392(2)                                                                                         | 17.9661(1)                                                                                         | 17.8011(1)                                                                                          | 17.8577(1)                                                                                          | 17.8160(2)                                                                                          |
| <i>b</i> (Å)                                                              | 15.2059(5)                                                                    | 17.9429(1)                                                                                         | 18.0392(2)                                                                                         | 17.9661(1)                                                                                         | 17.8011(1)                                                                                          | 17.8577(1)                                                                                          | 17.8160(2)                                                                                          |
| <i>c</i> (Å)                                                              | 18.3941(6)                                                                    | 20.5857(2)                                                                                         | 20.6238(3)                                                                                         | 20.6209(2)                                                                                         | 20.0830(2)                                                                                          | 20.1981(1)                                                                                          | 20.1441(3)                                                                                          |
| $\alpha$ (°)                                                              | 110.730(3)                                                                    | 90.00                                                                                              | 90.00                                                                                              | 90.00                                                                                              | 90.00                                                                                               | 90.00                                                                                               | 90.00                                                                                               |
| $\beta$ (°)                                                               | 93.912(2)                                                                     | 90.00                                                                                              | 90.00                                                                                              | 90.00                                                                                              | 90.00                                                                                               | 90.00                                                                                               | 90.00                                                                                               |
| $\gamma$ (°)                                                              | 94.630(2)                                                                     | 120.00                                                                                             | 120.00                                                                                             | 120.00                                                                                             | 120.00                                                                                              | 120.00                                                                                              | 120.00                                                                                              |
| Volume (Å <sup>3</sup> )                                                  | 1929.53(10)                                                                   | 5739.60(7)                                                                                         | 5812.11(15)                                                                                        | 5764.29(7)                                                                                         | 5511.28(8)                                                                                          | 5578.17(7)                                                                                          | 5537.31(12)                                                                                         |
| <i>Z</i>                                                                  | 2                                                                             | 2                                                                                                  | 2                                                                                                  | 2                                                                                                  | 2                                                                                                   | 2                                                                                                   | 2                                                                                                   |
| $\rho_{calc}$ (g/cm <sup>3</sup> )                                        | 1.641                                                                         | 1.900                                                                                              | 1.901                                                                                              | 1.934                                                                                              | 1.809                                                                                               | 1.812                                                                                               | 1.844                                                                                               |
| $\mu$ (mm <sup>-1</sup> )                                                 | 1.847                                                                         | 16.447                                                                                             | 16.251                                                                                             | 16.396                                                                                             | 6.481                                                                                               | 6.413                                                                                               | 6.470                                                                                               |
| Reflections collected                                                     | 13406                                                                         | 36565                                                                                              | 20470                                                                                              | 19492                                                                                              | 19661                                                                                               | 20824                                                                                               | 20188                                                                                               |
| Unique reflections                                                        | 6766                                                                          | 3989                                                                                               | 3990                                                                                               | 3993                                                                                               | 3809                                                                                                | 3860                                                                                                | 3838                                                                                                |
| GOOF on F <sup>2</sup>                                                    | 1.150                                                                         | 1.189                                                                                              | 1.068                                                                                              | 1.153                                                                                              | 1.320                                                                                               | 1.260                                                                                               | 1.199                                                                                               |
| <i>R</i> <sub>1</sub> [ <i>I</i> > 2 $\sigma$ ( <i>I</i> )] <sup>a</sup>  | 0.0402                                                                        | 0.0428                                                                                             | 0.0500                                                                                             | 0.0344                                                                                             | 0.0487                                                                                              | 0.0442                                                                                              | 0.0613                                                                                              |
| <i>wR</i> <sub>2</sub> [ <i>I</i> ≥ 2 $\sigma$ ( <i>I</i> )] <sup>b</sup> | 0.0904                                                                        | 0.1175                                                                                             | 0.1294                                                                                             | 0.1026                                                                                             | 0.1461                                                                                              | 0.1282                                                                                              | 0.1575                                                                                              |
| <i>R</i> <sub>1</sub> [all refl.] <sup>a</sup>                            | 0.0494                                                                        | 0.0428                                                                                             | 0.0525                                                                                             | 0.0359                                                                                             | 0.0569                                                                                              | 0.0455                                                                                              | 0.0637                                                                                              |
| <i>wR</i> <sub>2</sub> [all refl.] <sup>b</sup>                           | 0.0947                                                                        | 0.1175                                                                                             | 0.1310                                                                                             | 0.1034                                                                                             | 0.1533                                                                                              | 0.1289                                                                                              | 0.1585                                                                                              |
| <i>R</i> <sub>int</sub>                                                   | 0.0253                                                                        | 0.0376                                                                                             | 0.0469                                                                                             | 0.0334                                                                                             | 0.0377                                                                                              | 0.0277                                                                                              | 0.0512                                                                                              |

<sup>a</sup>  $R_1 = \sum |F_o| - |F_c| / \sum |F_o|$ . <sup>b</sup>  $wR_2 = \{[\sum w(F_o^2 - F_c^2)^2] / \sum [w(F_o^2)^2]\}^{1/2}$ ;  $w = 1 / [\sigma^2(F_o^2) + (aP)^2 + bP]$ , where  $P = [\max(F_o^2, 0) + 2F_c^2] / 3$  for all data.

**Table S2** Selected distances (Å) and angles (°) of Cu<sub>3</sub>L<sub>3</sub> complexes.

| Cu <sub>3</sub> L <sub>3</sub>                     |                      |                 |            |
|----------------------------------------------------|----------------------|-----------------|------------|
| distance                                           |                      | angle           |            |
| Cu(1)–N(2)                                         | 1.853(3)             | N(3)–Cu(1)–N(2) | 175.53(14) |
| Cu(1)–N(3)                                         | 1.850(3)             | N(5)–Cu(2)–N(4) | 176.78(14) |
| Cu(2)–N(4)                                         | 1.857(3)             | N(6)–Cu(3)–N(1) | 176.81(14) |
| Cu(2)–N(5)                                         | 1.852(3)             |                 |            |
| Cu(3)–N(1)                                         | 1.867(3)             |                 |            |
| Cu(3)–N(6)                                         | 1.865(3)             |                 |            |
| Cu–Cu<br>(between Cu <sub>3</sub> L <sub>3</sub> ) | 3.080(5)<br>3.571(2) |                 |            |



**Table S3** Selected distances (Å) of the **G@X** complexes.

|                                                    | <b>B@I</b> | <b>B@Br</b> | <b>MB@I</b> | <b>MB@Br</b> | <b>TPB@I</b> | <b>TPB@Br</b> |
|----------------------------------------------------|------------|-------------|-------------|--------------|--------------|---------------|
| <b>Cu<sub>2</sub>X<sub>2</sub>(QT)<sub>2</sub></b> |            |             |             |              |              |               |
| Cu(1)–Cu(1)#1                                      | 2.6766(2)  | 2.6859(1)   | 2.6639(2)   | 2.6798(1)    | 2.6476(1)    | 2.6527(2)     |
| Cu(1)–X(1)                                         | 2.6047(9)  | 2.4282(9)   | 2.5775(10)  | 2.4271(9)    | 2.6099(7)    | 2.4311(13)    |
| Cu(1)–X(2)                                         | 2.5801(8)  | 2.4662(9)   | 2.6038(10)  | 2.4638(9)    | 2.5828(7)    | 2.4662(13)    |
| Cu(1)–N(1)                                         | 2.0537(1)  | 2.0460(1)   | 2.0618(2)   | 2.0516(1)    | 2.0572(1)    | 2.0503(2)     |
| Cu(1)–S(1)                                         | 2.3609(13) | 2.3230(13)  | 2.3608(16)  | 2.3233(13)   | 2.3527(11)   | 2.3198(17)    |
| <b>Cu<sub>3</sub>Pz<sub>3</sub></b>                |            |             |             |              |              |               |
| Cu(2)–N(2)                                         | 1.8555(1)  | 1.8567(1)   | 1.8488(2)   | 1.8586(1)    | 1.8522(1)    | 1.8509(2)     |
| Cu(2)–N(3)#2                                       | 1.8522(1)  | 1.8634(1)   | 1.8536(2)   | 1.8560(1)    | 1.8543(1)    | 1.8482(2)     |
| Cu(2)–Cu(1)#2                                      | 3.2228(2)  | 3.2227(2)   | 3.2241(3)   | 3.2264(1)    | 3.2120(2)    | 3.2139(4)     |
| Cu–Cu(intercage)                                   | 3.7063(2)  | 3.7204(2)   | 3.6280(4)   | 3.6181(1)    | 3.7469(2)    | 3.7572(4)     |
| Cu–Cu(intracage)                                   | 7.0873(4)  | 6.8197(4)   | 7.1977(8)   | 6.9973(3)    | 7.0545(4)    | 6.8049(8)     |
| Symmetry code: #1 +x, +y, 1/2–z; #2 –y, +x–y, +z   |            |             |             |              |              |               |

**Table S4** Selected bond angles (°) of the **G@X** complexes.

|                                                    | <b>B@I</b> | <b>B@Br</b> | <b>MB@I</b> | <b>MB@Br</b> | <b>TPB@I</b> | <b>TPB@Br</b> |
|----------------------------------------------------|------------|-------------|-------------|--------------|--------------|---------------|
| <b>Cu<sub>2</sub>X<sub>2</sub>(QT)<sub>2</sub></b> |            |             |             |              |              |               |
| X(1)–Cu(1)–X(2)                                    | 116.32(3)  | 111.03(3)   | 117.17(3)   | 112.18(3)    | 118.02(2)    | 113.02(4)     |
| S(1)–Cu(1)–X(1)                                    | 105.45(4)  | 128.47(5)   | 125.51(5)   | 127.84(5)    | 103.90(3)    | 127.97(6)     |
| S(1)–Cu(1)–X(2)                                    | 125.40(4)  | 106.55(4)   | 103.85(5)   | 104.99(4)    | 124.70(4)    | 104.83(6)     |
| N(1)–Cu(1)–X(1)                                    | 111.03(11) | 111.25(11)  | 110.23(14)  | 111.19(11)   | 111.85(10)   | 109.59(15)    |
| N(1)–Cu(1)–X(2)                                    | 109.55(11) | 110.88(11)  | 110.79(14)  | 112.01(11)   | 108.74(10)   | 112.44(15)    |
| N(1)–Cu(1)–S(1)                                    | 84.53(12)  | 85.74(11)   | 84.51(14)   | 85.76(11)    | 84.85(10)    | 85.97(15)     |
| <b>Cu<sub>3</sub>Pz<sub>3</sub></b>                |            |             |             |              |              |               |
| N(2)–Cu(2)–N(3)#2                                  | 176.5(2)   | 176.54(18)  | 175.8(2)    | 175.71(18)   | 177.39(16)   | 177.7(2)      |
| Symmetry code: #1 +x, +y, 1/2–z; #2 –y, +x–y, +z   |            |             |             |              |              |               |

**Table S5** Selected distances (Å) of TPM molecules

|                    |                                                                 | <b>B@I</b> | <b>B@Br</b> | <b>MB@I</b> | <b>MB@Br</b> | <b>TPB@I</b> | <b>TPB@Br</b> | <b>MB@S</b> <sup>a</sup>            |
|--------------------|-----------------------------------------------------------------|------------|-------------|-------------|--------------|--------------|---------------|-------------------------------------|
| S–S                | edge                                                            | 11.0104(7) | 11.0021(1)  | 11.0123(5)  | 11.0145(7)   | 11.0192(7)   | 11.0241(1)    | 10.5~10.8                           |
|                    | column                                                          | 5.8278(4)  | 5.8784(7)   | 5.7414(3)   | 5.9272(4)    | 5.6538(3)    | 5.7450(7)     | 5.3~5.4                             |
| Cu–Cu              | <i>intra</i> -Cu <sub>3</sub> Pz <sub>3</sub>                   | 3.2228(2)  | 3.2227(2)   | 3.2241(3)   | 3.2264(1)    | 3.2120(2)    | 3.2139(4)     | 3.09~3.23                           |
|                    | <i>intra</i> -cage                                              | 7.0873(4)  | 7.1977(8)   | 6.9973(3)   | 7.0545(4)    | 6.8197(4)    | 6.8049(8)     | 6.461~6.572                         |
|                    | <i>inter</i> -cage<br>(between Cu <sub>3</sub> L <sub>3</sub> ) | 3.7063(2)  | 3.7204(2)   | 3.6280(4)   | 3.6181(1)    | 3.7469(2)    | 3.7572(4)     | 2.901                               |
| Q1-Q2 <sup>b</sup> |                                                                 | 7.6255(5)  | 7.6400(5)   | 7.5767(9)   | 7.6036(4)    | 7.5487(5)    | 7.5927(9)     | 5.4463(2)<br>5.3763(1) <sup>c</sup> |

<sup>a</sup> crystal data is referred in our previous report: Z.-C. Shi, D.-X. Zhang, S.-Z. Zhan, M. Li, J. Zheng, H. Yang, X.-P. Zhou, *Isr. J. Chem.*, 2019, 59, 317.

<sup>b</sup> Q1: the center of six Cu atoms in a TPM molecule. Q2: the center of Cu<sub>2</sub>X<sub>2</sub> in a TPM molecule. Q1 and Q2 are shown in Fig. S4.

<sup>c</sup> Q2 is the S atom in thiophene groups.

## Section 3: Additional Structural Description

### 3.1 $^1\text{H}$ NMR and PXRD

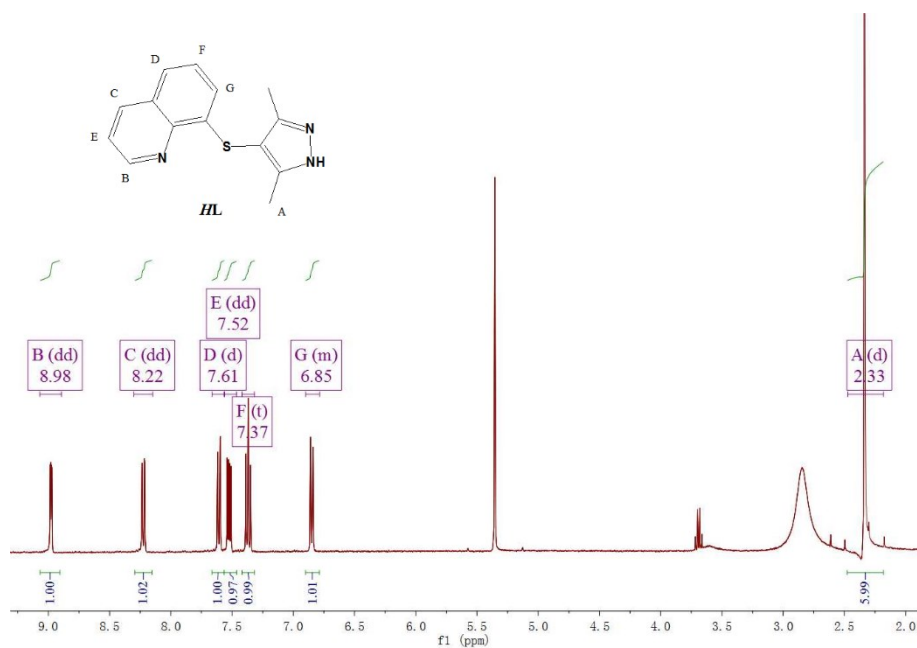

Fig. S1  $^1\text{H}$  NMR of the ligand *HL* in  $\text{CD}_2\text{Cl}_2$ .

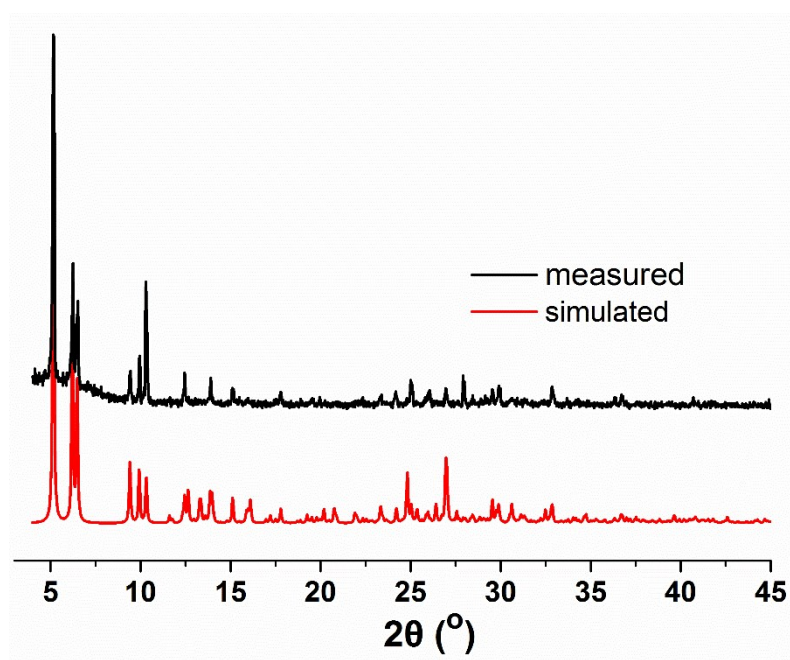

(a)  $\text{Cu}_3\text{L}_3$

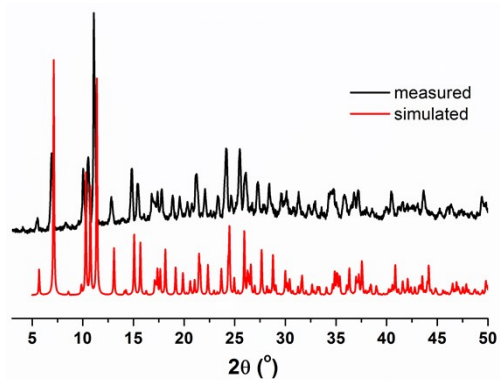

(b) B@I

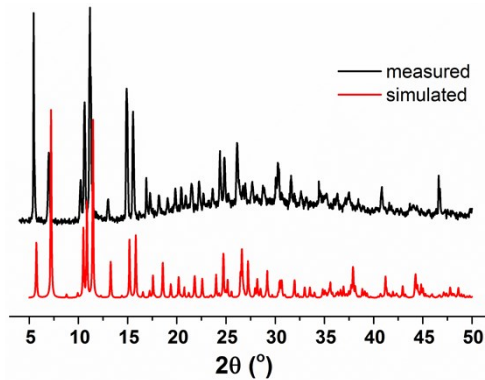

(c) B@Br

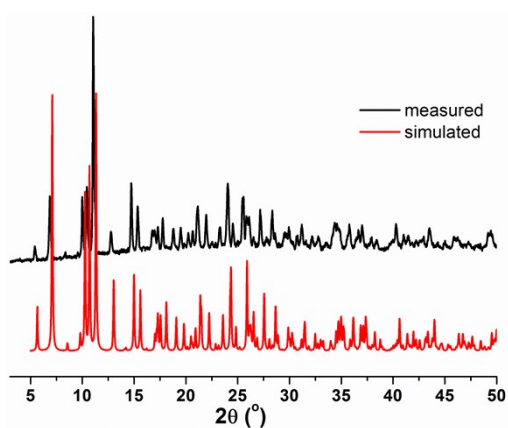

(d) MB@I

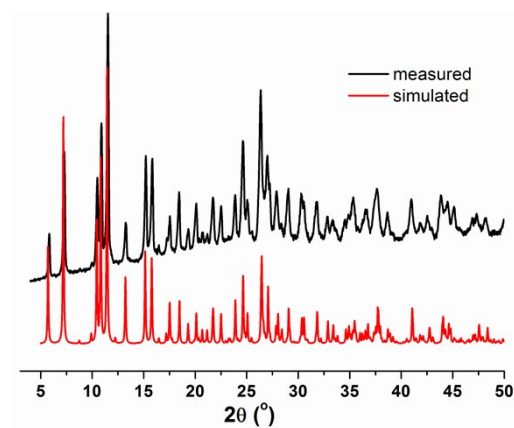

(e) MB@Br

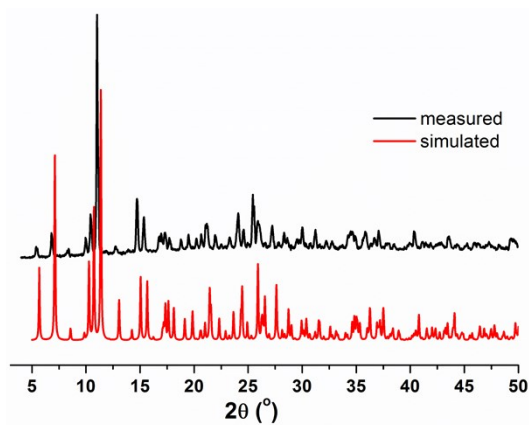

(f) TPB@I

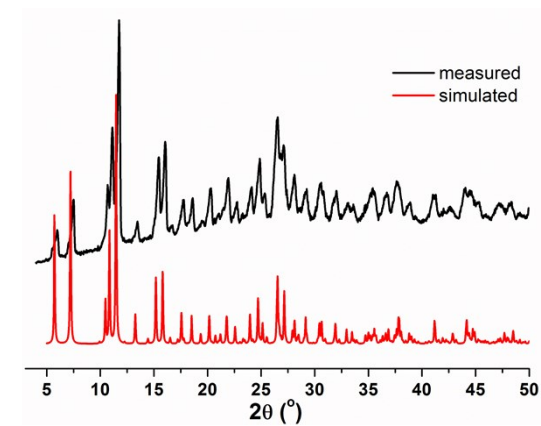

(g) TPB@Br

**Fig. S2** Comparison of the measured and simulated PXR D patterns of  $\text{Cu}_3\text{L}_3$  and  $\text{G@X}$  TPMs.

### 3.2 Structural Description

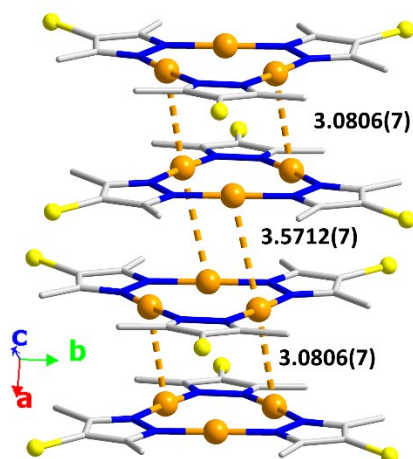

**Fig. S3** Intertrimeric Cu...Cu interactions of  $\text{Cu}_3\text{L}_3$  complex (Quinolinyl and methyl groups are omitted for clarity. Color codes: orange, Cu; blue, N; yellow, S; gray, C).

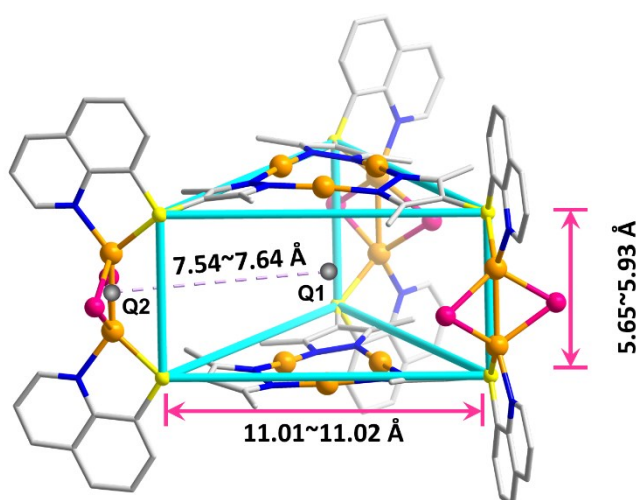

**Fig. S4** Illustration of the inner size of these TPM molecules by taking the **B@I** TPM as example. (Color codes: orange, Cu; blue, N; yellow, S; gray, C; purple, I)

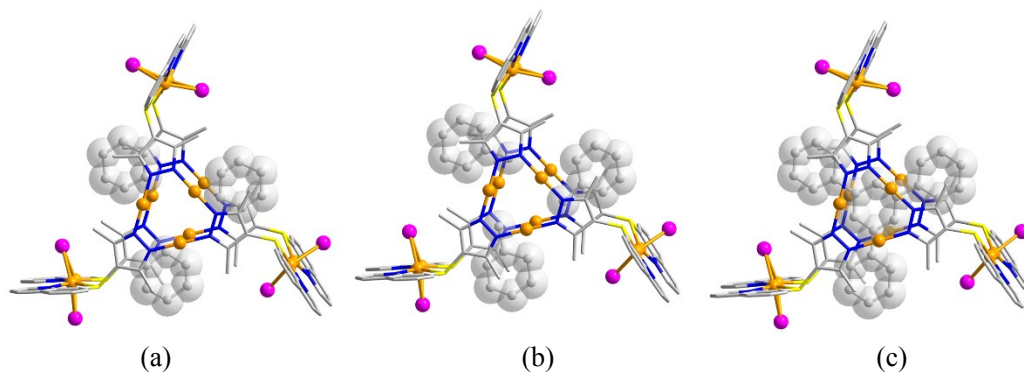

**Fig. S5** Molecular structures of the **G@Br** TPMs. (a) **B@Br**; (a) **MB@Br**; (a) **TPB@Br**. The guest molecules are depicted as space-filling model. (Color codes: orange, Cu; blue, N; yellow, S; gray, C; pink, Br)

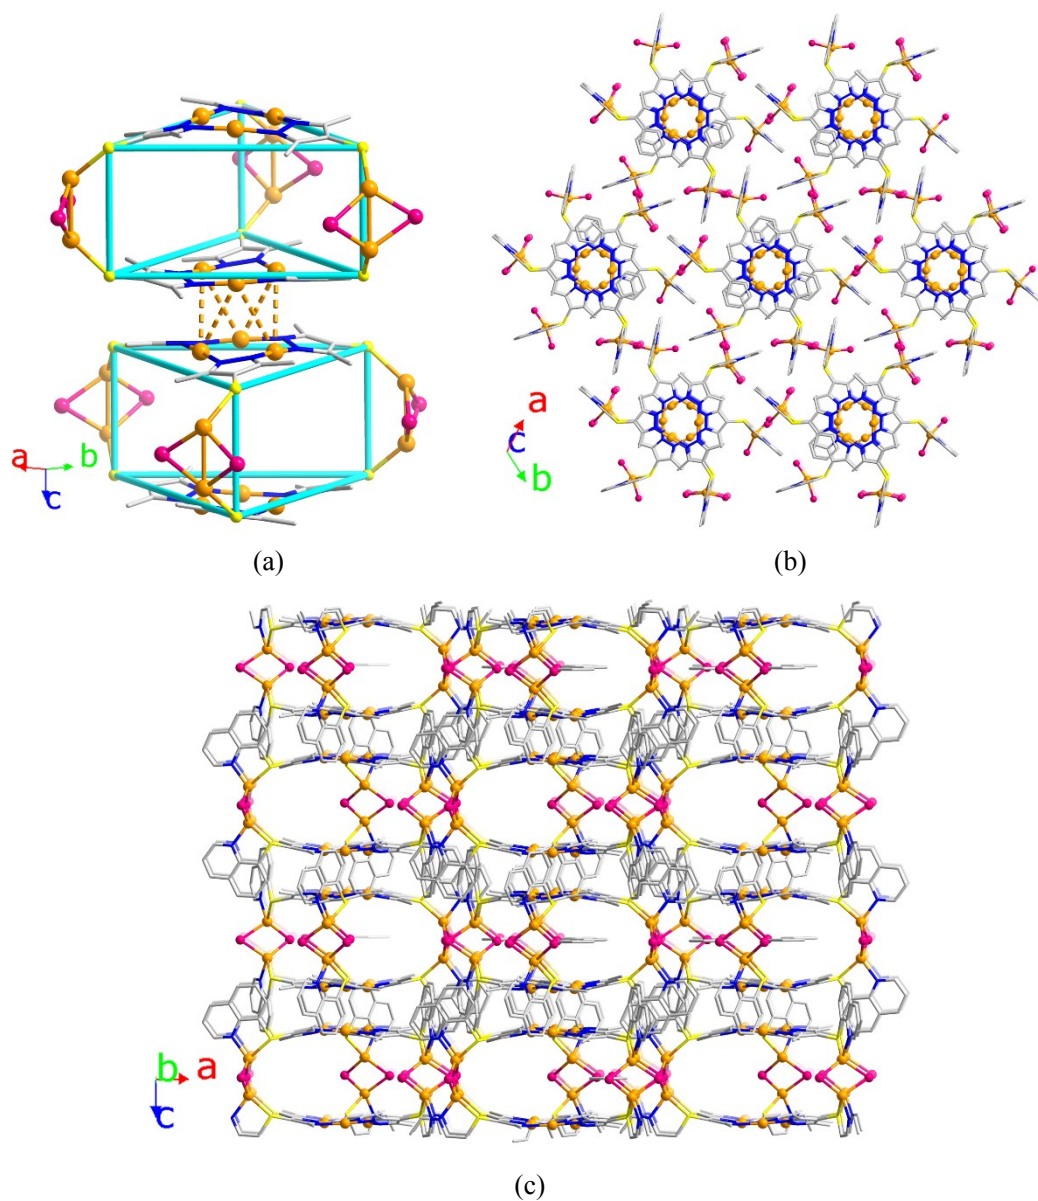

**Fig. S6** Packing structures of these TPMs by taking the vacant I TPM as example. (a) 1-D supramolecular chain along *c* axis supported by staggered Cu...Cu interactions between adjacent TPM molecules. (b-c) packing diagrams along *c* (b) and *b* (c) axis. (Color codes: red, Cu; blue, N; yellow, S; black, C; purple, I)

### 3.3 Thermogravimetric analysis

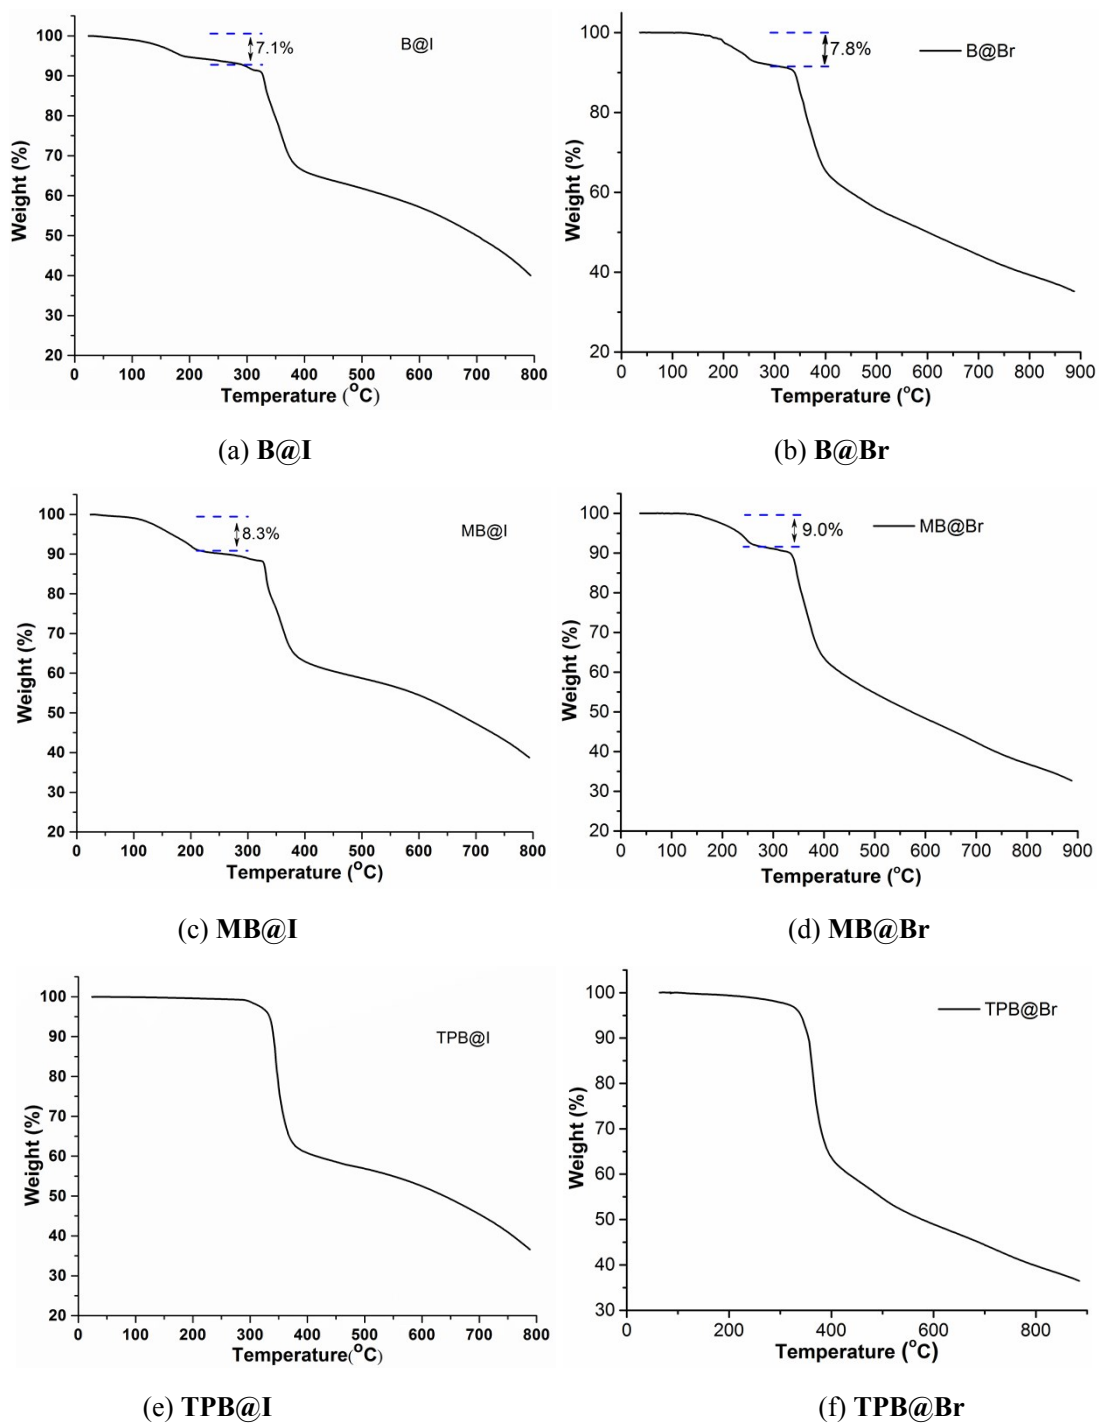

**Fig. S7** Thermogravimetric plot of interlocked metallogages. The weight loss before 300 °C are in agreement with the calculated percentage of guests (7.12% in **B@I**, 7.79% in **B@Br**, 8.29% in **MB@I**, 9.06% in **MB@Br**).



## Section 4: Spectra Properties

### 4.1 UV-Vis absorption spectra

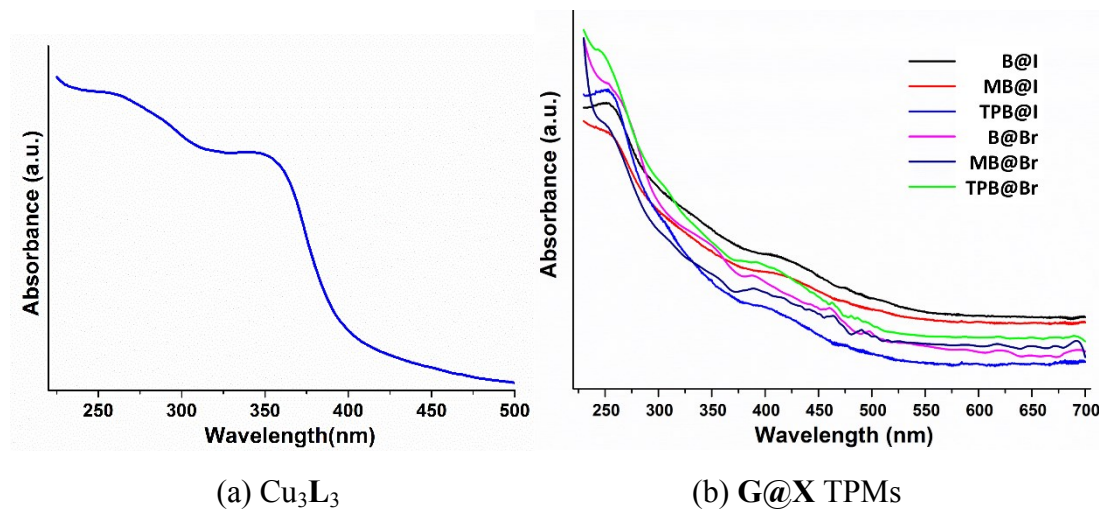

Fig. S8 UV-Vis absorption spectra of  $\text{Cu}_3\text{L}_3$  and  $\text{G@X}$  TPMs in solid state.

### 4.2 Photoluminescence spectra

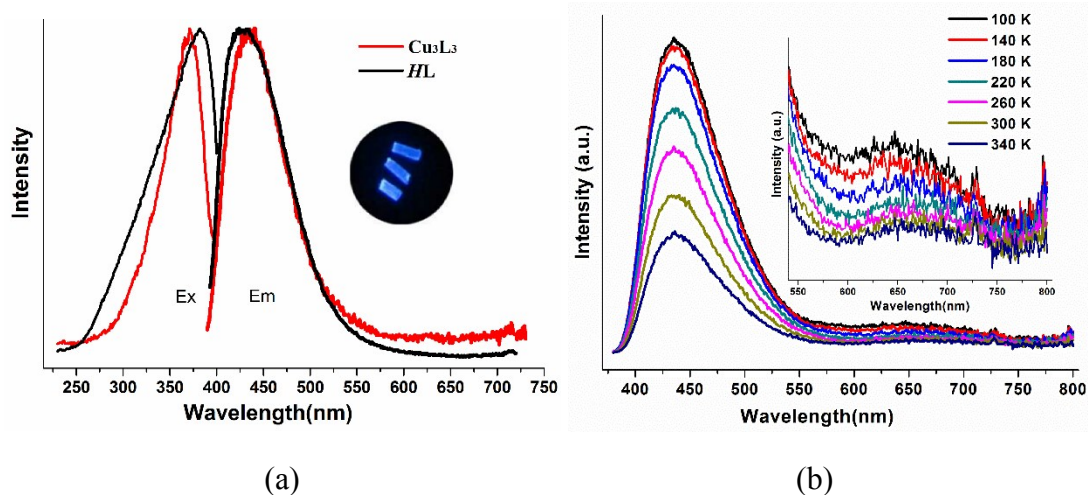

Fig. S9 (a) Solid photoluminescence spectra of the ligand  $\text{HL}$  and  $\text{Cu}_3\text{L}_3$  complex at room temperature (inset image: crystal photograph of  $\text{Cu}_3\text{L}_3$  complex under 365 nm UV light). (b) Temperature-dependent photoluminescence spectra from 100 to 340 K of  $\text{Cu}_3\text{L}_3$  complex with 360 nm excitations.

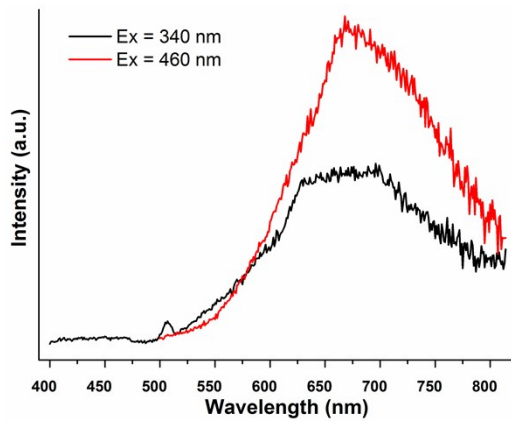

(a)

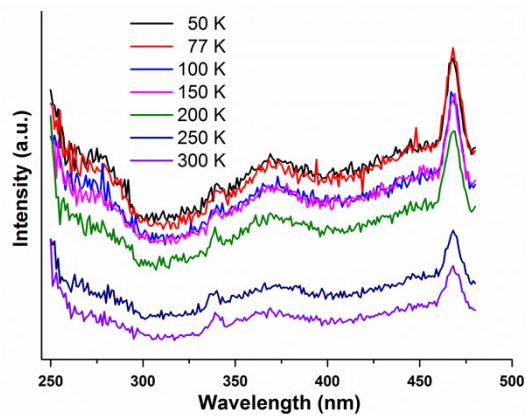

(b)

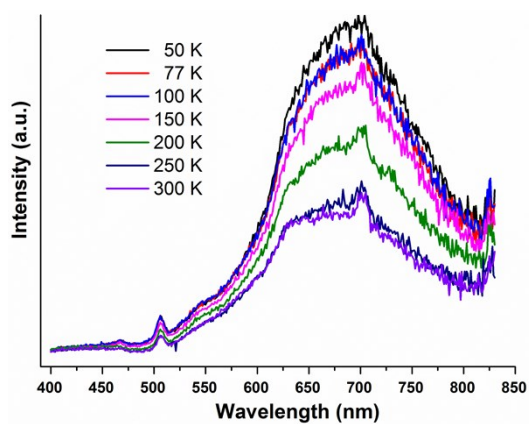

(c)

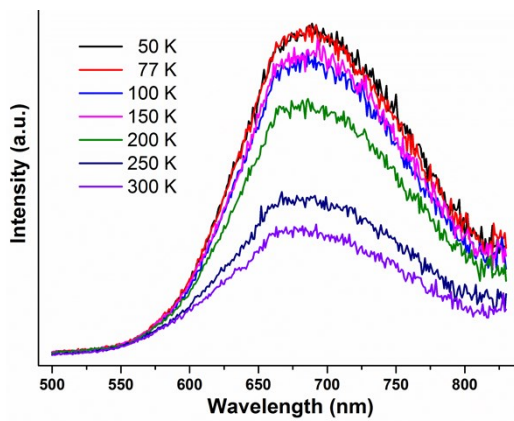

(d)

**Fig. S10** Photoluminescence spectra of **B@I** TPMs in solid state.

(a) Emission spectra excited by 340 and 460 nm at room temperature.

(b) Excitation spectra monitored by 680 nm under various temperatures.

(c-d) Emission spectra under various temperatures excited by 340 (c) and 460 nm (d).

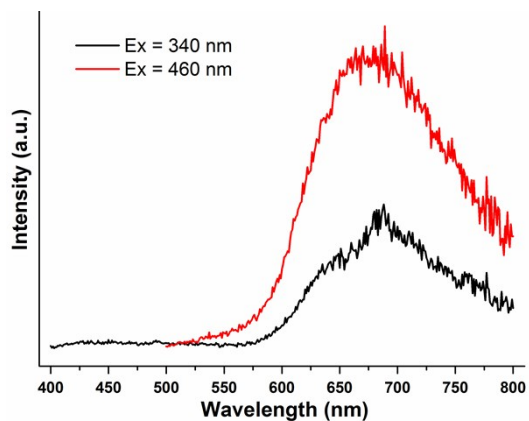

(a)

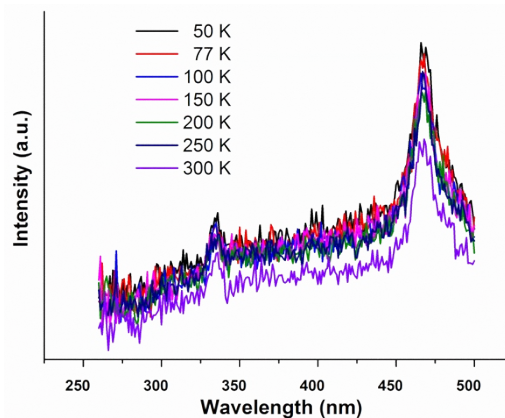

(b)

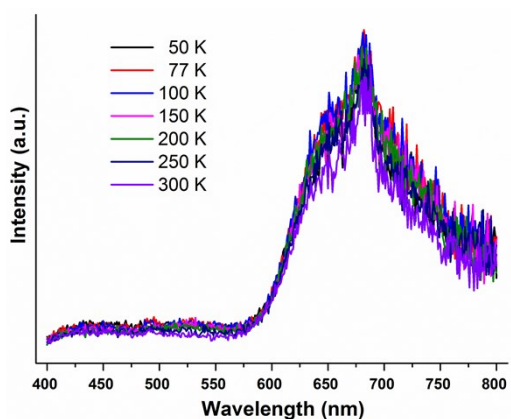

(c)

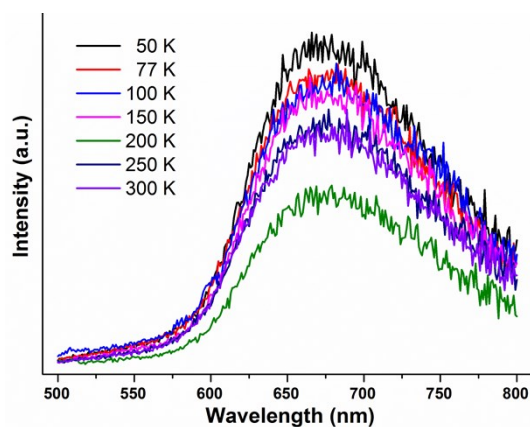

(d)

**Fig. S11** Photoluminescence spectra of **B@Br** TPMs in solid state.

(a) Emission spectra excited by 340 and 460 nm at room temperature.

(b) Excitation spectra monitored by 675 nm under various temperatures.

(c-d) Emission spectra under various temperatures excited by 340 (c) and 460 nm (d).

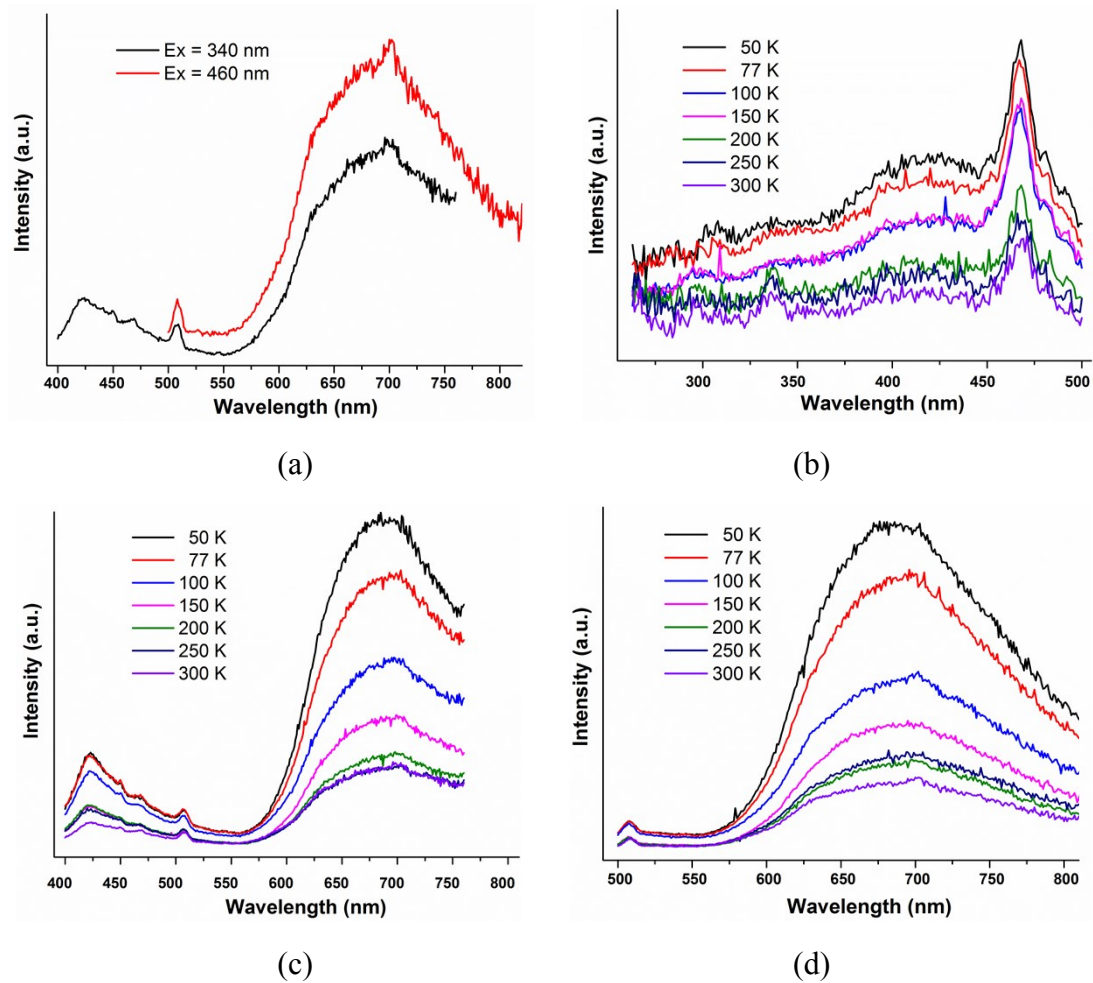

**Fig. S12** Photoluminescence spectra of **MB@I** TPMs in solid state.

(a) Emission spectra excited by 340 and 460 nm at room temperature.

(b) Excitation spectra monitored by 680 nm under various temperatures.

(c-d) Emission spectra under various temperatures excited by 340 (c) and 460 nm (d).

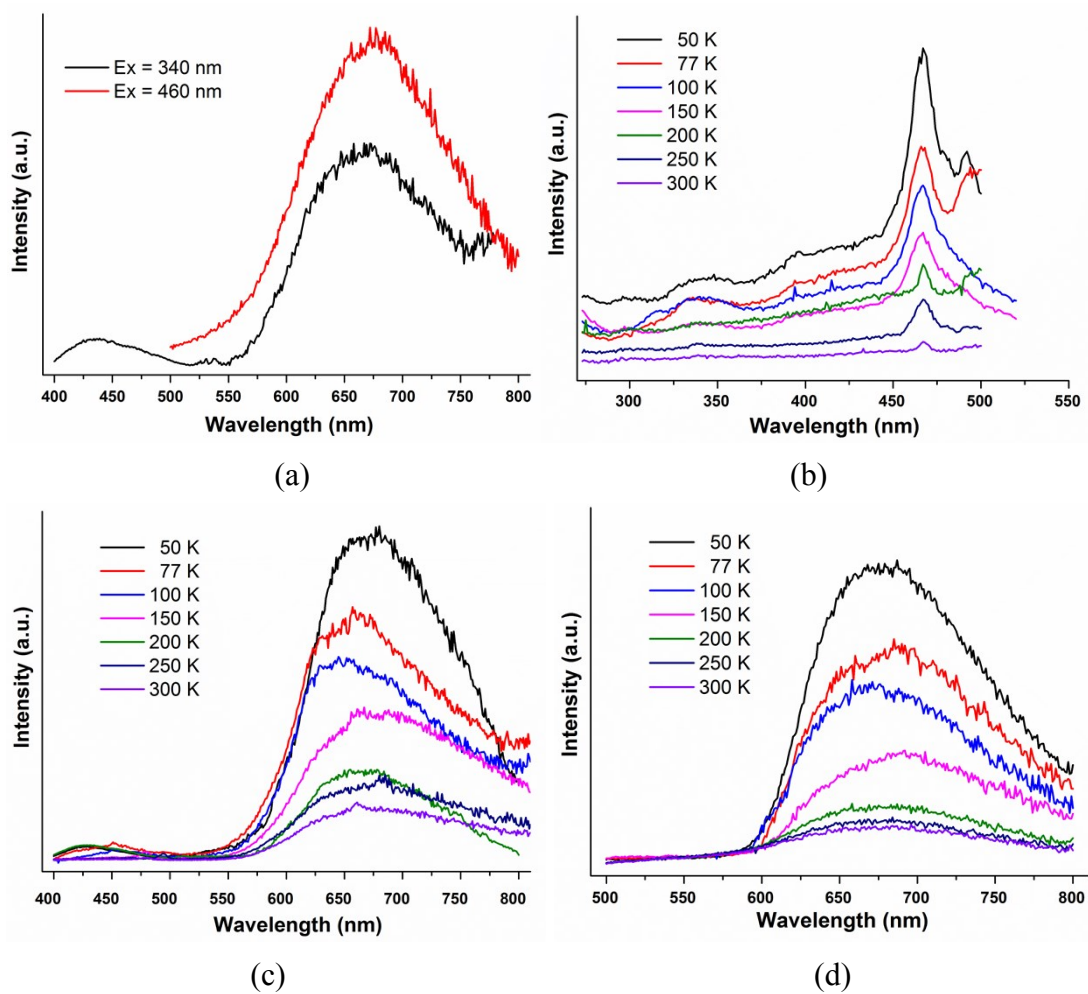

**Fig. S13** Photoluminescence spectra of MB@Br TPMs in solid state.

(a) Emission spectra excited by 340 and 460 nm at room temperature.

(b) Excitation spectra monitored by 675 nm under various temperatures.

(c-d) Emission spectra under various temperatures excited by 340 (c) and 460 nm (d).



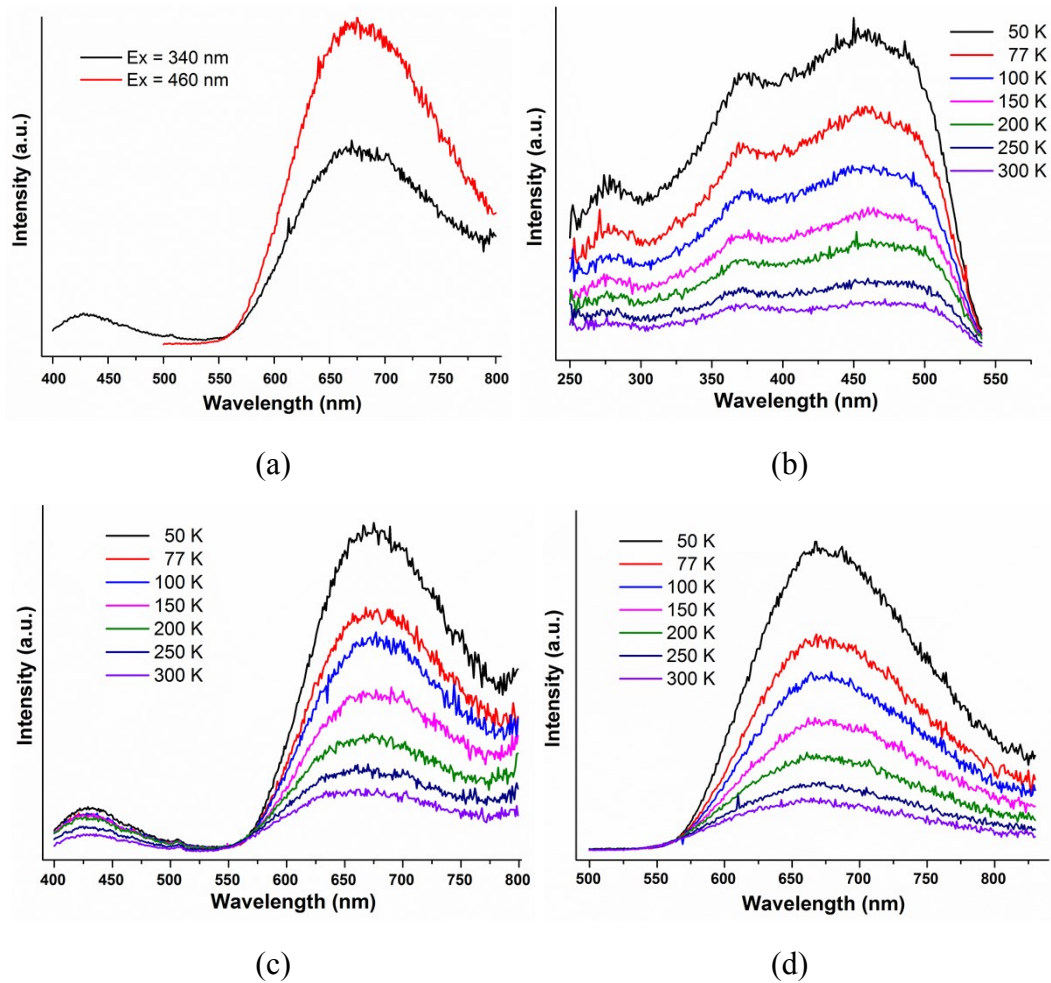

**Fig. S14** Photoluminescence spectra of TPB@I TPMs in solid state.

(a) Emission spectra excited by 340 and 460 nm at room temperature.

(b) Excitation spectra monitored by 680 nm under various temperatures.

(c-d) Emission spectra under various temperatures excited by 340 (c) and 460 nm (d).

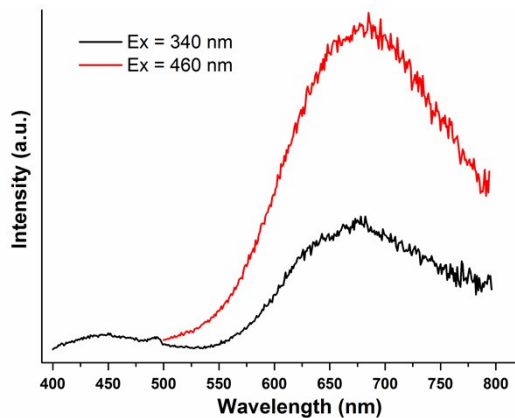

(a)

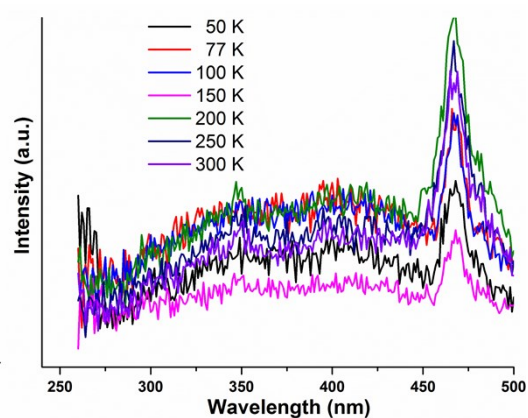

(b)

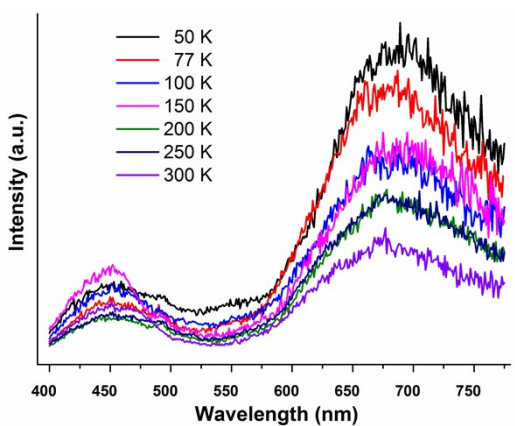

(c)

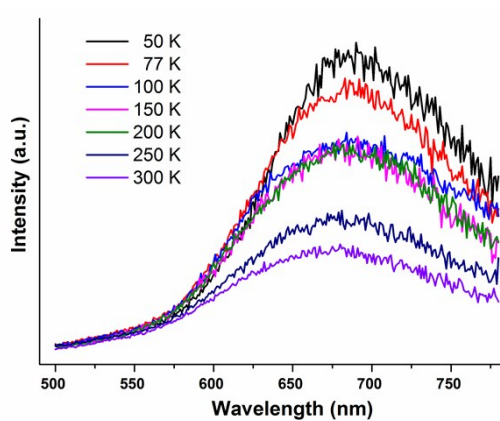

(d)

**Fig. S15** Photoluminescence spectra of **TPB@Br** TPMs in solid state.

(a) Emission spectra excited by 340 and 460 nm at room temperature.

(b) Excitation spectra monitored by 675 nm under various temperatures.

(c-d) Emission spectra under various temperatures excited by 340 (c) and 460 nm (d).

## Section 5: Computational Details

### 5.1 EDA calculation

To make a further comprehend into the nature of host-guest interactions in these TPM molecules, we evaluated the energy of the interaction ( $\Delta E_{\text{int}}$ ) in the TPM molecules in terms of different chemically meaningful quantities with energy decomposition analysis (EDA) proposed by Ziegler and Rauk.<sup>S5-S7</sup>  $\Delta E_{\text{int}}$  can be decomposed into four quantities according to:  $\Delta E_{\text{int}} = \Delta E_{\text{Pauli}} + \Delta E_{\text{elstat}} + \Delta E_{\text{orb}} + \Delta E_{\text{disp}}$ , where the  $\Delta E_{\text{Pauli}}$  part concerns the nature of instability owing to the four-electron/two-orbital repulsion between occupied orbitals between host and guest. The  $\Delta E_{\text{elstat}}$  and  $\Delta E_{\text{orb}}$  interpret the favorable electrostatic and covalent character of the interaction. Furthermore, the dispersion interaction ( $\Delta E_{\text{disp}}$ ) was evaluated via the pairwise correction of Grimme<sup>S8</sup> (DFT-D3), indicating a stabilizing character. And the EDA calculation was performed using the ADF2016 code.<sup>S9-S10</sup> Triple- $\xi$  and one polarization functions (STO-TZP) basis sets were employed within the generalized gradient approximation (GGA) of BLYP exchange–correlation functional. The pair-wise Grimme correction (D3)<sup>S11-S14</sup> and Becke–Johnson damping functions<sup>S15-S16</sup> were considered for the empirical dispersion correction to density functional theory (DFT-D). The crystal molecular structure was used for calculation.

The molecular structures of **B@S** and **MB@S** in our previous report<sup>S17</sup> were used as calculation models to compare host-guest interactions with the titled TPM molecules. It is noted that molecular structure of **B@S** is derived from the **MB@S** by replacing the  $\text{CH}_3$  in **MB** with H atom.



## 5.2 Density Functional Theory (DFT) and Time-Dependent Density Functional Theory (TDDFT) Calculations

Calculated models of both single metallocage and dimeric metallocage was taken from the X-ray data of **B@I** at 100 K. Since either UV-Vis absorption spectra or photoluminescence spectra seem to be insensitive to the encapsulated guest molecules, the vacant metallocage without any guest molecules was used for calculations so as to reduce calculation cost.

Molecular orbital calculations were carried out for both single cage and its dimer, and the first 30  $S_0 \rightarrow S_n$  spin-allowed transitions were also calculated for the single cage with IOP(9/40=4). All calculation were performed using PBE0 functional<sup>S18</sup> in Gaussian 09 package<sup>S19</sup> with Lanl2dz effective core potential<sup>S20</sup> (ECP) for Cu as well as I atoms and 6-31G\*\* basis set<sup>S21</sup> for other atoms. The cub files for drawing contours of orbitals (isovalue = 0.02) and electron density difference (EDD) maps (isovalue =  $5.0 \times 10^{-4}$  a.u.) were obtained by Multiwfn 3.5<sup>S22</sup> using formatted checkpoint files (fchk) and/or Gaussian output files (log). The EDD maps for  $S_n$  state with oscillator strength ( $f$ ) lower than 0.01 have not been provided, except for  $S_1$  state.

**Table S6** The calculated first 30 transitions based on the S<sub>0</sub> state.

| No. | singlet-singlet spin-allowed transition |               |        | singlet-triplet spin-forbidden transition |               |
|-----|-----------------------------------------|---------------|--------|-------------------------------------------|---------------|
|     | E/eV                                    | $\lambda$ /nm | $f$    | E/eV                                      | $\lambda$ /nm |
| 1   | 2.253                                   | 550.7         | 0.0000 | 2.165                                     | 573.0         |
| 2   | 2.254                                   | 550.6         | 0.0000 | 2.166                                     | 572.8         |
| 3   | 2.254                                   | 550.4         | 0.0000 | 2.166                                     | 572.8         |
| 4   | 2.259                                   | 549.2         | 0.0012 | 2.166                                     | 572.8         |
| 5   | 2.260                                   | 549.0         | 0.0012 | 2.167                                     | 572.7         |
| 6   | 2.260                                   | 548.9         | 0.0013 | 2.167                                     | 572.6         |
| 7   | 2.524                                   | 491.5         | 0.0000 | 2.254                                     | 550.4         |
| 8   | 2.525                                   | 491.5         | 0.0000 | 2.254                                     | 550.4         |
| 9   | 2.525                                   | 491.3         | 0.0000 | 2.255                                     | 550.3         |
| 10  | 2.528                                   | 490.9         | 0.0015 | 2.255                                     | 550.3         |
| 11  | 2.528                                   | 490.8         | 0.0013 | 2.255                                     | 550.3         |
| 12  | 2.529                                   | 490.7         | 0.0007 | 2.255                                     | 550.2         |
| 13  | 2.613                                   | 474.9         | 0.0020 | 2.473                                     | 501.7         |
| 14  | 2.613                                   | 474.9         | 0.0096 | 2.473                                     | 501.7         |
| 15  | 2.615                                   | 474.5         | 0.1364 | 2.474                                     | 501.5         |
| 16  | 2.632                                   | 471.4         | 0.0191 | 2.474                                     | 501.5         |
| 17  | 2.633                                   | 471.3         | 0.0184 | 2.474                                     | 501.4         |
| 18  | 2.634                                   | 471.0         | 0.0011 | 2.475                                     | 501.3         |
| 19  | 2.828                                   | 438.8         | 0.0000 | 2.745                                     | 452.1         |
| 20  | 2.829                                   | 438.5         | 0.0000 | 2.745                                     | 452.0         |
| 21  | 2.830                                   | 438.4         | 0.0000 | 2.745                                     | 452.0         |
| 22  | 2.833                                   | 437.9         | 0.0000 | 2.745                                     | 451.9         |
| 23  | 2.834                                   | 437.8         | 0.0000 | 2.746                                     | 451.9         |
| 24  | 2.835                                   | 437.7         | 0.0000 | 2.746                                     | 451.8         |
| 25  | 2.835                                   | 437.7         | 0.0000 | 2.828                                     | 438.8         |
| 26  | 2.836                                   | 437.6         | 0.0000 | 2.829                                     | 438.5         |
| 27  | 2.836                                   | 437.5         | 0.0000 | 2.830                                     | 438.4         |
| 28  | 2.840                                   | 436.9         | 0.0000 | 2.833                                     | 437.9         |
| 29  | 2.841                                   | 436.7         | 0.0000 | 2.834                                     | 437.8         |
| 30  | 2.841                                   | 436.7         | 0.0000 | 2.835                                     | 437.7         |

**Table S7** The calculated absorption spectra, the electron density difference (EDD) maps and the orbital transitions of the selected vertical singlet excited states with  $f > 0.01$  at TD-PBE0/(Lan12dz+6-31G\*\*) level (isovalue for EDD is  $5.0 \times 10^{-4}$  a.u.).

| No. | E(eV) | $\lambda$ (nm) | $f$    | EDD                                                                                |                                                                                      | Major transitions and contributions<br>(H = HOMO, L = LUMO) | Type         |
|-----|-------|----------------|--------|------------------------------------------------------------------------------------|--------------------------------------------------------------------------------------|-------------------------------------------------------------|--------------|
|     |       |                |        | Top view                                                                           | Side view                                                                            |                                                             |              |
| 1   | 2.253 | 550.7          | 0.0000 | 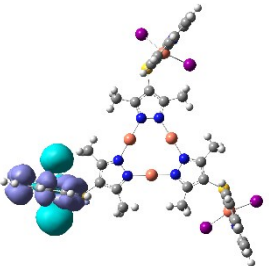  |   | H→L+5 (69.1653%)<br>H→L+3 (19.3467%)                        | MLCT<br>XLCT |
| 15  | 2.615 | 474.5          | 0.1364 |   |   | H-4→L+1 (21.78%)<br>H-5→L (20.52%)<br>H-7→L+1 (13.94%)      | MLCT<br>XLCT |
| 16  | 2.632 | 474.5          | 0.0191 |  |  | H-3→L+3 (17.01%)<br>H-3→L+5 (16.93%)<br>H-5→L+5 (15.48%)    | MLCT<br>XLCT |

|    |       |       |        |                                                                                   |                                                                                     |                                                          |              |
|----|-------|-------|--------|-----------------------------------------------------------------------------------|-------------------------------------------------------------------------------------|----------------------------------------------------------|--------------|
| 17 | 2.633 | 471.3 | 0.0184 | 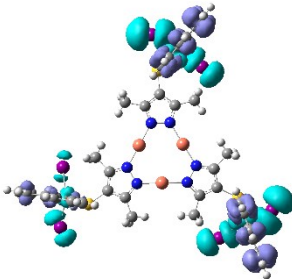 |  | H-4→L+3 (22.16%)<br>H-5→L+4 (18.53%)<br>H-7→L+3 (11.96%) | MLCT<br>XLCT |
|----|-------|-------|--------|-----------------------------------------------------------------------------------|-------------------------------------------------------------------------------------|----------------------------------------------------------|--------------|

**Table S8** The Hirshfeld compositions (%) of selected MOs in the ground state at the PBE0 level of theory for the TPM complexes.

| units                           | atoms | H-8          | H-7          | H-6          | H-5          | H-4          | H-3          | H-2          | H-1          | H            | L            | L+1          | L+2          | L+3          | L+4          | L+5          |
|---------------------------------|-------|--------------|--------------|--------------|--------------|--------------|--------------|--------------|--------------|--------------|--------------|--------------|--------------|--------------|--------------|--------------|
| Cu <sub>2</sub> I <sub>2</sub>  | Cu    | <b>30.32</b> | <b>30.10</b> | <b>30.08</b> | <b>43.32</b> | <b>43.00</b> | <b>43.00</b> | <b>44.81</b> | <b>44.76</b> | <b>44.76</b> | 1.07         | 1.13         | 1.13         | 1.07         | 1.12         | 1.12         |
|                                 | I     | <b>48.74</b> | <b>47.54</b> | <b>47.59</b> | <b>50.73</b> | <b>49.66</b> | <b>49.67</b> | <b>47.33</b> | <b>47.38</b> | <b>47.39</b> | 0.31         | 0.31         | 0.31         | 0.52         | 0.53         | 0.53         |
| QT                              | C     | 3.17         | 3.59         | 3.58         | 2.68         | 2.51         | 2.51         | 1.29         | 1.29         | 1.29         | <b>80.41</b> | <b>80.36</b> | <b>80.36</b> | <b>80.29</b> | <b>80.28</b> | <b>80.28</b> |
|                                 | N     | 4.02         | 3.85         | 3.85         | 0.26         | 0.44         | 0.44         | 5.36         | 5.34         | 5.34         | <b>15.55</b> | <b>15.59</b> | <b>15.59</b> | <b>15.33</b> | <b>15.39</b> | <b>15.39</b> |
|                                 | S     | 9.47         | 9.45         | 9.44         | 1.38         | 1.74         | 1.74         | 0.50         | 0.51         | 0.51         | 1.28         | 1.28         | 1.28         | 1.34         | 1.34         | 1.34         |
| Cu <sub>3</sub> Pz <sub>3</sub> | Cu    | 0.15         | 0.54         | 0.54         | 0.08         | 0.17         | 0.17         | 0.03         | 0.03         | 0.03         | 0.19         | 0.11         | 0.11         | 0.21         | 0.12         | 0.12         |
|                                 | C     | 3.00         | 3.37         | 3.37         | 1.29         | 1.90         | 1.90         | 0.33         | 0.33         | 0.33         | 0.59         | 0.58         | 0.58         | 0.62         | 0.59         | 0.59         |
|                                 | N     | 0.84         | 1.27         | 1.27         | 0.19         | 0.50         | 0.50         | 0.07         | 0.07         | 0.07         | 0.05         | 0.06         | 0.06         | 0.04         | 0.05         | 0.05         |

**Table S9** Information of Selected MOs for the single cage at PBE0/(Lan12dz+6-31G\*\*) level (isovalue for orbital contours is 0.02).

|                    |                                                                                     |                                                                                      |                                                                                       |                                                                                       |
|--------------------|-------------------------------------------------------------------------------------|--------------------------------------------------------------------------------------|---------------------------------------------------------------------------------------|---------------------------------------------------------------------------------------|
| Orbital<br>Contour | 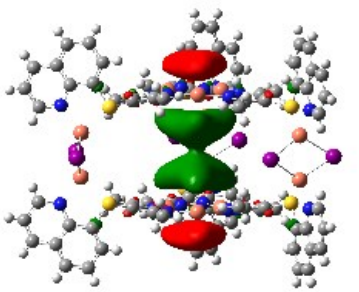   |    |    |    |
| E(eV)              | 0.036                                                                               | -0.288                                                                               | -0.314                                                                                | -0.639                                                                                |
| Orb. No.           | LUMO+14                                                                             | LUMO+13                                                                              | LUMO+12                                                                               | LUMO+11                                                                               |
| Orbital<br>Contour |    |    |    |    |
| E(eV)              | -0.639                                                                              | -0.640                                                                               | -0.640                                                                                | -0.640                                                                                |
| Orb. No.           | LUMO+10                                                                             | LUMO+9                                                                               | LUMO+8                                                                                | LUMO+7                                                                                |
| Orbital<br>Contour |  |  |  |  |
| E(eV)              | -0.640                                                                              | -1.806                                                                               | -1.806                                                                                | -1.807                                                                                |
| Orb. No.           | LUMO+6                                                                              | LUMO+5                                                                               | LUMO+4                                                                                | LUMO+3                                                                                |



|                    |                                                                                    |                                                                                     |                                                                                      |                                                                                      |
|--------------------|------------------------------------------------------------------------------------|-------------------------------------------------------------------------------------|--------------------------------------------------------------------------------------|--------------------------------------------------------------------------------------|
| Orbital<br>Contour | 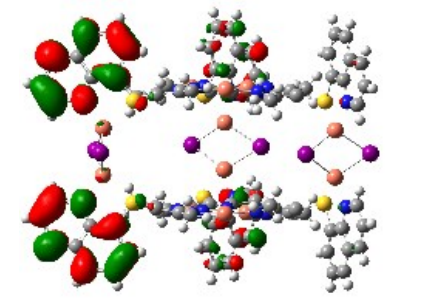  |   |   |   |
| E(eV)              | -1.813                                                                             | -1.813                                                                              | -1.813                                                                               | -4.879                                                                               |
| Orb. No.           | LUMO+2                                                                             | LUMO+1                                                                              | LUMO                                                                                 | HOMO                                                                                 |
| Orbital<br>Contour |   |   |   |   |
| E(eV)              | -4.880                                                                             | -4.880                                                                              | -5.126                                                                               | -5.126                                                                               |
| Orb. No.           | HOMO-1                                                                             | HOMO-2                                                                              | HOMO-3                                                                               | HOMO-4                                                                               |
| Orbital<br>Contour |  |  |  |  |
| E(eV)              | -5.132                                                                             | -5.186                                                                              | -5.186                                                                               | -5.199                                                                               |
| Orb. No.           | HOMO-5                                                                             | HOMO-6                                                                              | HOMO-7                                                                               | HOMO-8                                                                               |

**Table S10** Information of Selected MOs for the dimer of TPM at PBE0/(Lan12dz+6-31G\*\*) level (isovalue for orbital contours is 0.02).

|                 |                                                                                    |                                                                                     |                                                                                      |                                                                                      |
|-----------------|------------------------------------------------------------------------------------|-------------------------------------------------------------------------------------|--------------------------------------------------------------------------------------|--------------------------------------------------------------------------------------|
| Orbital Contour | 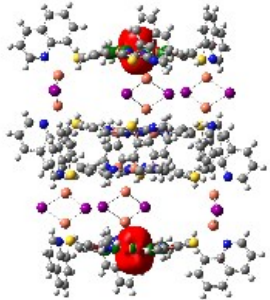  |   |   |   |
| E(eV)           | -0.342                                                                             | -0.345                                                                              | -0.570                                                                               | -0.570                                                                               |
| Orb. No.        | LUMO+26                                                                            | LUMO+25                                                                             | LUMO+24                                                                              | LUMO+23                                                                              |
| Orbital Contour |   |   |   |   |
| E(eV)           | -0.571                                                                             | -0.571                                                                              | -0.574                                                                               | -0.574                                                                               |
| Orb. No.        | LUMO+22                                                                            | LUMO+21                                                                             | LUMO+20                                                                              | LUMO+19                                                                              |
| Orbital Contour |  |  |  |  |
| E(eV)           | -0.667                                                                             | -0.668                                                                              | -0.668                                                                               | -0.668                                                                               |
| Orb. No.        | LUMO+18                                                                            | LUMO+17                                                                             | LUMO+16                                                                              | LUMO+15                                                                              |



|                    |                                                                                    |                                                                                     |                                                                                      |                                                                                      |
|--------------------|------------------------------------------------------------------------------------|-------------------------------------------------------------------------------------|--------------------------------------------------------------------------------------|--------------------------------------------------------------------------------------|
| Orbital<br>Contour | 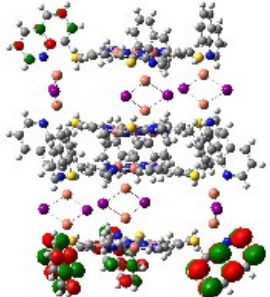  |   |   |   |
| E(eV)              | -0.668                                                                             | -0.668                                                                              | -0.709                                                                               | -1.730                                                                               |
| Orb. No.           | LUMO+14                                                                            | LUMO+13                                                                             | LUMO+12                                                                              | LUMO+11                                                                              |
| Orbital<br>Contour |   |   |   |   |
| E(eV)              | -1.731                                                                             | -1.731                                                                              | -1.735                                                                               | -1.735                                                                               |
| Orb. No.           | LUMO+10                                                                            | LUMO+9                                                                              | LUMO+8                                                                               | LUMO+7                                                                               |
| Orbital<br>Contour |  |  |  |  |
| E(eV)              | -1.742                                                                             | -1.837                                                                              | -1.837                                                                               | -1.837                                                                               |
| Orb. No.           | LUMO+6                                                                             | LUMO+5                                                                              | LUMO+4                                                                               | LUMO+3                                                                               |



|                    |                                                                                    |                                                                                     |                                                                                      |                                                                                      |
|--------------------|------------------------------------------------------------------------------------|-------------------------------------------------------------------------------------|--------------------------------------------------------------------------------------|--------------------------------------------------------------------------------------|
| Orbital<br>Contour | 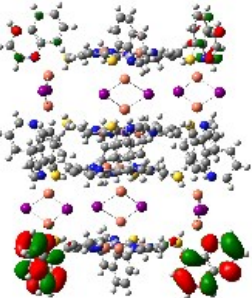  |   |   |   |
| E(eV)              | -1.837                                                                             | -1.838                                                                              | -1.838                                                                               | -4.898                                                                               |
| Orb. No.           | LUMO+2                                                                             | LUMO+1                                                                              | LUMO                                                                                 | HOMO                                                                                 |
| Orbital<br>Contour |   |   |   |   |
| E(eV)              | -4.898                                                                             | -4.898                                                                              | -4.898                                                                               | -4.898                                                                               |
| Orb. No.           | HOMO-1                                                                             | HOMO-2                                                                              | HOMO-3                                                                               | HOMO-4                                                                               |
| Orbital<br>Contour |  |  |  |  |
| E(eV)              | -4.898                                                                             | -5.149                                                                              | -5.149                                                                               | -5.150                                                                               |
| Orb. No.           | HOMO-5                                                                             | HOMO-6                                                                              | HOMO-7                                                                               | HOMO-8                                                                               |

**Table S11** Selected TDDFT results in the first 40 singlet-singlet spin-allowed vertical excited state for dimer of  $\text{Cu}_3\text{L}_3$ .

| No | $\lambda(\text{nm})$ | E(eV) | $f$   | EDD                                                                                                                 | Type                                 |
|----|----------------------|-------|-------|---------------------------------------------------------------------------------------------------------------------|--------------------------------------|
| 1  | 367.8                | 3.374 | 0.022 | 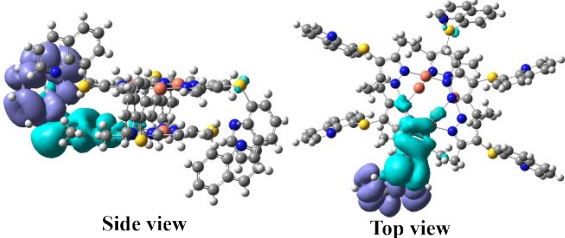 <p>Side view      Top view</p>   | $^1\text{ILCT}$ ,<br>$^1\text{MLCT}$ |
| 2  | 367.7                | 3.375 | 0.012 |  <p>Side view      Top view</p>   | $^1\text{ILCT}/$                     |
| 3  | 345.9                | 3.587 | 0.209 |  <p>Side view      Top view</p>  | $^1\text{ILCT}$                      |
| 7  | 338.9                | 3.660 | 0.242 |  <p>Side view      Top view</p> | $^1\text{ILCT}$                      |
| 8  | 338.7                | 3.663 | 0.002 |  <p>Side view      Top view</p> | $^1\text{ILCT}$                      |

## Section 6: Reference

- S1 (a) T.-J. Won, J. K. Clegg, L. F. Lindoy, J. C. McMurtrie, *Cryst. Growth Des.* 2007, **7**, 972. (b) Z. Yoshida, H. Ogoshi, T. Tokumitsu, *Tetrahedron*. 1970, **26**, 2987. (c) S.-Z. Zhan, W. Chen, W. Lu, J. Zheng, F. Ding, T. Feng, D. Li, *Inorg. Chem.* 2019, **58**, 1081. (d) S.-Z. Zhan, J.-H. Li, M. Li, G.-H. Zhang, X.-W. Liu, J. Zheng, S. W. Ng, D. Li, *Chem. Commun.*, 2019, 11992.
- S2 G. M. Sheldrick, *Acta Crystallogr., Sect. C: Struct. Chem.*, 2015, **71**, 3.
- S3 O. V. Dolomanov, L. J. Bourhis, R. J. Gildea, J. A. K. Howard, H. Puschmann, *J. Appl. Cryst.*, 2009, **42**, 339.
- S4 O. V. Dolomanov, A. J. Blake, N. R. Champness, M. Schröder, *J. Appl. Crystallogr.* 2003, **36**, 1283.
- S5 von Hopffgarten, M.; Frenking, G. *Wiley Interdiscip. Rev.: Comput. Mol. Sci.* 2012, **2**, 43.
- S6 K. Morokuma, *J. Chem. Phys.* 1971, **55**, 1236.
- S7 T. Ziegler, A. Rauk, *Theor. Chim. Acta* 1977, **46**, 1.
- S8 S. Grimme, *Wiley Interdiscip. Rev.: Comput. Mol. Sci.* 2011, **1**, 211
- S9 G. te Velde, E. J. Baerends, *Phys. Rev. B: Condens. Matter Mater. Phys.* 1991, **44**, 7888.
- S10 C. Fonseca Guerra, J. G. Snijders, G. te Velde, E. J. Baerends, *Theor. Chem. Accounts Theor. Comput. Model.* 1998, **99**, 391.
- S11 S. Grimme, *J. Comput. Chem.* 2006, **27**, 1787.
- S12 S. Grimme, *J. Comput. Chem.* 2004, **25**, 1463.
- S13 S. Grimme, J. Antony, S. Ehrlich, H. Krieg, *J. Chem. Phys.* 2010, **132**, 154104.
- S14 S. Grimme, *Wiley Interdiscip. Rev.: Comput. Mol. Sci.* 2011, **1**, 211.
- S15 E. R. Johnson, A. D. Becke, *J. Chem. Phys.* 2005, **123**, 024101.
- S16 S. Grimme, S. Ehrlich, L. Goerigk, *J. Comput. Chem.* 2011, **32**, 1456.
- S17 Z.-C. Shi, D.-X. Zhang, S.-Z. Zhan, M. Li, J. Zheng, H. Yang, X.-P. Zhou, *Isr. J. Chem.*, 2019, **59**, 317.
- S18 (a) J. P. Perdew, K. Burke, M. Ernzerhof, *Phys. Rev. Lett.* 1996, **77**, 3865. (b) J. P. Perdew, K. Burke, M. Ernzerhof, *Phys. Rev. Lett.* 1997, **78**, 1396.
- S19 M. J. Frisch, G. W. Trucks, H. B. Schlegel, G. E. Scuseria, M. A. Robb, J. R. Cheeseman, G. Scalmani, V. Barone, B. Mennucci, G. A. Petersson, H. Nakatsuji, M. Caricato, X. Li, H. P. Hratchian, A. F. Izmaylov, J. Bloino, G. Zheng, J. L. Sonnenberg, M. Hada, M. Ehara, K. Toyota, R. Fukuda, J. Hasegawa, M. Ishida, T. Nakajima, Y. Honda, O. Kitao, H. Nakai, T. Vreven, Jr. J. A. Montgomery, J. E. Peralta, F. Ogliaro, M. Bearpark, J. J. Heyd, E. Brothers, K. N. Kudin, V. N. Staroverov, R. Kobayashi, J. Normand, K. Raghavachari, A. Rendell, J. C. Burant, S. S. Iyengar, J. Tomasi, M. Cossi, N. Rega, J. M. Millam, M. Klene, J. E. Knox, J.B. Cross, V. Bakken, C. Adamo, J. Jaramillo, R. Gomperts, R. E. Stratmann, O. Yazyev, A. J.

Austin, R. Cammi, C. Pomelli, J. Ochterski, R. L. Martin, K. Morokuma, V. G. Zakrzewski, G. A. Voth, P. Salvador, J. J. Dannenberg, S. Dapprich, A. D. Daniels, O. Farkas, J. B. Foresman, J. V. Ortiz, J. Cioslowski, D. J. Fox, GAUSSIAN 09 (Revision A.02), Gaussian, Inc., Wallingford, CT, 2009

S20 P. J. Hay, W. R. Wadt, *J. Chem. Phys.* 1985, **82**, 270.

S21 J. E. Del Bene, *Chem. Phys. Lett.* 1983, **94(2)**, 213.

S22 T. Lu, F. W. J. Chen, *Comp. Chem.* 2012, **33**, 580.
